# Supplementary material for: Cellular Internalization and Exiting Behavior of Zwitterionic 4-Armed Star-Shaped Polymers
Source: MDPI journal article supplement (doi:10.3390/molecules28114479), 2023-06-01
Supplement: s1 [file s1]

[Supporting Information]

# Cellular Internalization and Exiting Behavior of Zwitterionic 4-Armed Star-Shaped Polymers

Yuta Yoshizaki and Tomohiro Konno \*

Graduate School of Pharmaceutical Sciences, Tohoku University, Sendai 980-8578, Japan;  
yuta.yoshizaki.c5@tohoku.ac.jp

\* Correspondence: t-konno@tohoku.ac.jp; Tel.: +81-22-795-6841

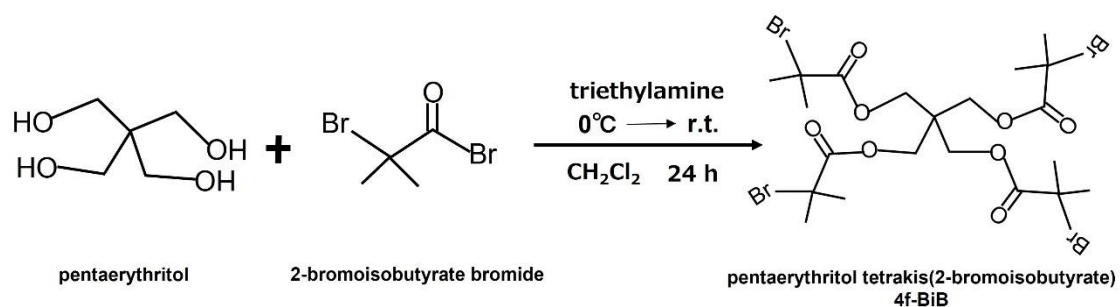

**Scheme S1.** Synthesis of pentaerythritol tetrakis(2-bromoisobutyrate) (4f-BiB).

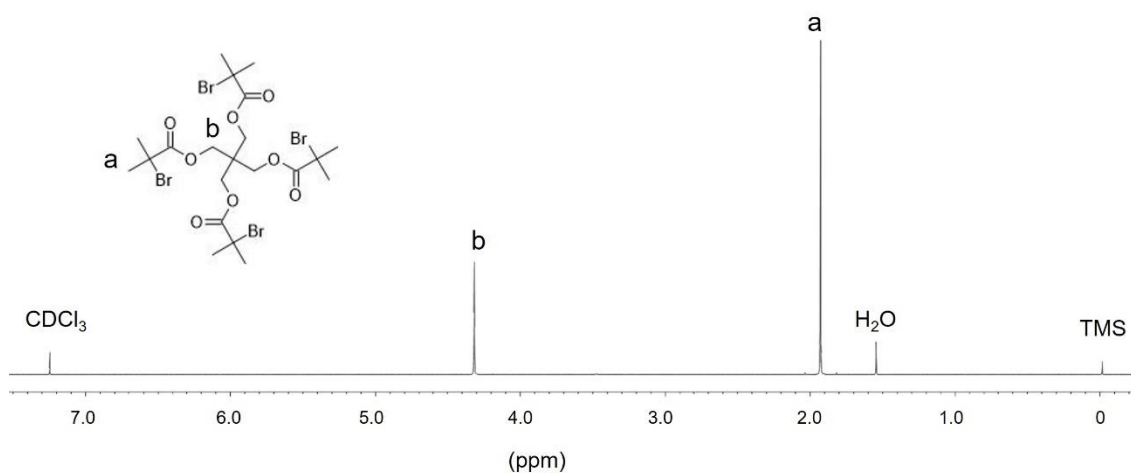

**Figure S1.**  $^1\text{H}$ -NMR spectrum of pentaerythritol tetrakis(2-bromoisobutyrate) 4f-BiB (600 MHz,  $\text{CDCl}_3$ ).

**Table S1.** The reaction conditions of polymerization

| Abb.         | The Feed Ratio of<br>[Monomer]/[Initiator] | Solvent                 |
|--------------|--------------------------------------------|-------------------------|
| 4armPMB10k   | 44                                         | Ethanol/DMF (19/1, v/v) |
| 4armPMB40k   | 177                                        | Ethanol/DMF (19/1, v/v) |
| LinearPMB10k | 44                                         | Ethanol                 |
| LinearPMB40k | 177                                        | Ethanol                 |
| 4armPMPC10k  | 36                                         | Ethanol/DMF (19/1, v/v) |

The feed ratio of  $[\text{CuBr}_2]/[\text{Initiator}] = 1/50$ . The feed ratio of  $[2,2'\text{-bipyridyl}]/[\text{Initiator}] = 1/1$ . The feed ratio of  $[\text{Ascorbic acid}]/[\text{Initiator}] = 10/1$ .

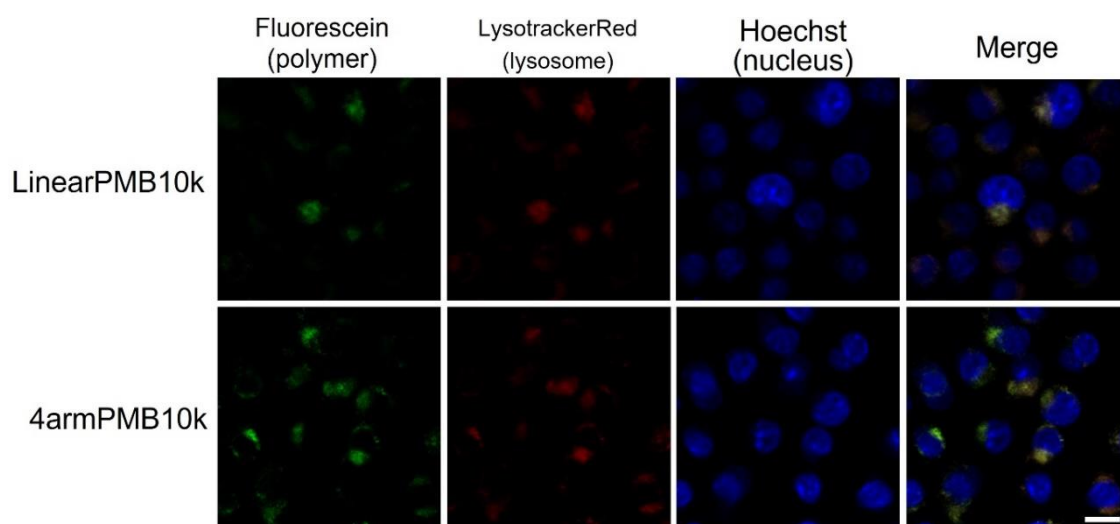

**Figure S2.** Confocal laser-scanning microscopic (CLSM) images of DC2.4 cells. Cells were incubated with 1 mg/mL of polymers in the presence of 10% FBS-supplemented RPMI-1640 for 6 h. Polymers were labeled with 0.1mol% of fluorescein methacrylate and cells were stained with LysotrackerRed (lysosome) and Hoechst33342 (nucleus). Scale bar represents 20  $\mu\text{m}$ . Images were acquired by using Nikon C2 confocal microscope.
